# Supplementary material for: Cloud obstruction and snow cover in Alpine areas from MODIS products
Source: Copernicus journal article supplement (doi:10.5194/hess-18-4579-2014), 2014-11-24
Supplement: Supplementary file 1 [file hess-18-4579-2014-supplement.zip]

| CLOUD FREE DAY 347 WITH CLOUD OF DAY 35 | C      | L                       | S      | TOT     |
|-----------------------------------------|--------|-------------------------|--------|---------|
| Source Aqua SCA                         | 10.44% | 59.68%                  | 29.88% | 100.00% |
| Source Terra SCA                        | 5.36%  | 66.69%                  | 27.95% | 100.00% |
| Masked Aqua SCA                         | 95.60% | 1.63%                   | 2.77%  | 100.00% |
| Masked Terra SCA                        | 96.56% | 2.31%                   | 1.12%  | 99.99%  |
| Delta C Aqua                            | 85.16% | <u>artificial cloud</u> |        |         |
| Delta C Terra                           | 91.20% | <u>artificial cloud</u> |        |         |

| Comparison between source TERRA and processed map |         | cloud removed cumulate | errors       |              | correct      |              |
|---------------------------------------------------|---------|------------------------|--------------|--------------|--------------|--------------|
|                                                   |         |                        | snow to land | land to snow | snow to snow | land to land |
| Step 1 + 2 + 3 + 4 + 5                            | 100.00% |                        | 1.75%        | 8.27%        | 27.67%       | 62.31%       |
| Step 1 + 2 + 3 + 4                                | 99.49%  |                        | 1.75%        | 8.25%        | 27.25%       | 62.25%       |
| Step 1 + 2 + 3                                    | 8.78%   |                        | 0.13%        | 0.65%        | 4.40%        | 3.61%        |
| Step 1 + 2                                        | 8.78%   |                        | 0.13%        | 0.65%        | 4.40%        | 3.61%        |
| Step 1                                            | 4.34%   |                        | 0.12%        | 0.30%        | 2.36%        | 1.56%        |
| Individual steps                                  |         | cloud removed relative | errors       |              | correct      |              |
| Step 5                                            | 0.51%   |                        | 0.00%        | 0.02%        | 0.42%        | 0.06%        |
| Step 4                                            | 90.71%  |                        | 1.62%        | 7.60%        | 22.85%       | 58.64%       |
| Step 3                                            | 0.00%   |                        | 0.00%        | 0.00%        | 0.00%        | 0.00%        |
| Step 2                                            | 4.44%   |                        | 0.01%        | 0.35%        | 2.04%        | 2.05%        |
| Step 1                                            | 4.34%   |                        | 0.12%        | 0.30%        | 2.36%        | 1.56%        |
| Overall                                           | 100.00% |                        | 1.75%        | 8.27%        | 27.67%       | 62.31%       |
|                                                   |         |                        | 10.02%       |              | 89.98%       |              |
