# Supplementary material for: Cloud obstruction and snow cover in Alpine areas from MODIS products
Source: Copernicus journal article supplement (doi:10.5194/hess-18-4579-2014), 2014-11-24
Supplement: Supplementary file 2 [file hess-18-4579-2014-supplement.zip]

# Validation 2004 - 6 DAYS

| CLOUD FREE DAY 332 WITH CLOUD OF DAY 202 | C      | L                       | S     | TOT     |
|------------------------------------------|--------|-------------------------|-------|---------|
| Source Aqua SCA                          | 10.22% | 80.10%                  | 9.67% | 99.99%  |
| Source Terra SCA                         | 18.30% | 77.54%                  | 4.16% | 100.00% |
| Masked Aqua SCA                          | 76.76% | 21.21%                  | 2.03% | 100.00% |
| Masked Terra SCA                         | 77.79% | 21.98%                  | 0.23% | 100.00% |
| Delta C Aqua                             | 66.54% | <u>artificial cloud</u> |       |         |
| Delta C Terra                            | 59.49% | <u>artificial cloud</u> |       |         |

| Comparison between source TERRA and processed map |                        | errors       |              | correct      |              |
|---------------------------------------------------|------------------------|--------------|--------------|--------------|--------------|
|                                                   | cloud removed cumulate | snow to land | land to snow | snow to snow | land to land |
| Step 1 + 2 + 3 + 4 + 5                            | 100.00%                | 1.11%        | 4.50%        | 5.50%        | 88.89%       |
| Step 1 + 2 + 3 + 4                                | 99.96%                 | 1.11%        | 4.49%        | 5.50%        | 88.86%       |
| Step 1 + 2 + 3                                    | 27.10%                 | 0.12%        | 1.51%        | 0.78%        | 24.70%       |
| Step 1 + 2                                        | 27.10%                 | 0.12%        | 1.51%        | 0.78%        | 24.70%       |
| Step 1                                            | 24.11%                 | 0.10%        | 1.35%        | 0.10%        | 22.56%       |
|                                                   | 0.00%                  | 0.00%        | 0.00%        | 0.00%        | 0.00%        |
| Individual steps                                  |                        | errors       |              | correct      |              |
|                                                   | cloud removed relative |              |              |              |              |
| Step 5                                            | 0.04%                  | 0.00%        | 0.01%        | 0.00%        | 0.03%        |
| Step 4                                            | 72.86%                 | 0.99%        | 2.98%        | 4.72%        | 64.16%       |
| Step 3                                            | 0.00%                  | 0.00%        | 0.00%        | 0.00%        | 0.00%        |
| Step 2                                            | 2.99%                  | 0.03%        | 0.16%        | 0.68%        | 2.14%        |
| Step 1                                            | 24.11%                 | 0.10%        | 1.35%        | 0.10%        | 22.56%       |
| Overall                                           | 100.00%                | 1.11%        | 4.50%        | 5.50%        | 88.89%       |
|                                                   |                        | 5.61%        |              | 94.39%       |              |
