# Supplementary material for: Cloud obstruction and snow cover in Alpine areas from MODIS products
Source: Copernicus journal article supplement (doi:10.5194/hess-18-4579-2014), 2014-11-24
Supplement: Supplementary file 3 [file hess-18-4579-2014-supplement.zip]

Validation 2011 - 4 DAYS

| CLOUD FREE DAY 40 WITH CLOUD OF DAY 120 | C      | L                       | S      | TOT     |
|-----------------------------------------|--------|-------------------------|--------|---------|
| Source Aqua SCA                         | 5.79%  | 75.26%                  | 18.95% | 100.00% |
| Source Terra SCA                        | 5.97%  | 76.12%                  | 17.91% | 100.00% |
| Masked Aqua SCA                         | 86.50% | 13.22%                  | 0.28%  | 100.00% |
| Masked Terra SCA                        | 90.04% | 9.91%                   | 0.05%  | 100.00% |
| Delta C Aqua                            | 80.71% | <u>artificial cloud</u> |        |         |
| Delta C Terra                           | 84.07% | <u>artificial cloud</u> |        |         |

| Comparison between source TERRA and processed map |                        | errors       |              | correct      |              |
|---------------------------------------------------|------------------------|--------------|--------------|--------------|--------------|
|                                                   | cloud removed cumulate | snow to land | land to snow | snow to snow | land to land |
| Step 1 + 2 + 3 + 4 + 5                            | 100.00%                | 1.16%        | 2.98%        | 20.09%       | 75.77%       |
| Step 1 + 2 + 3 + 4                                | 100.00%                | 1.16%        | 2.98%        | 20.09%       | 75.77%       |
| Step 1 + 2 + 3                                    | 97.62%                 | 1.04%        | 2.18%        | 19.40%       | 75.00%       |
| Step 1 + 2                                        | 97.21%                 | 1.01%        | 2.15%        | 19.34%       | 74.71%       |
| Step 1                                            | 12.74%                 | 0.04%        | 0.14%        | 0.16%        | 12.40%       |
| Individual steps                                  |                        | errors       |              | correct      |              |
|                                                   | cloud removed relative |              |              |              |              |
| Step 5                                            | 0.00%                  | 0.00%        | 0.00%        | 0.00%        | 0.00%        |
| Step 4                                            | 2.38%                  | 0.12%        | 0.80%        | 0.69%        | 0.77%        |
| Step 3                                            | 0.41%                  | 0.03%        | 0.03%        | 0.06%        | 0.29%        |
| Step 2                                            | 84.47%                 | 0.97%        | 2.01%        | 19.18%       | 62.31%       |
| Step 1                                            | 12.74%                 | 0.04%        | 0.14%        | 0.16%        | 12.40%       |
| Overall                                           | 100.00%                | 1.16%        | 2.98%        | 20.09%       | 75.77%       |
|                                                   |                        | 4.14%        |              | 95.86%       |              |
