# Supplementary material for: Cloud obstruction and snow cover in Alpine areas from MODIS products
Source: Copernicus journal article supplement (doi:10.5194/hess-18-4579-2014), 2014-11-24
Supplement: Supplementary file 4 [file hess-18-4579-2014-supplement.zip]

| CLOUD FREE DAY 342 WITH CLOUD OF DAY 287 | C      | L                       | S      | TOT     |
|------------------------------------------|--------|-------------------------|--------|---------|
| Source Aqua SCA                          | 12.66% | 75.96%                  | 11.38% | 100.00% |
| Source Terra SCA                         | 9.28%  | 79.67%                  | 11.05% | 100.00% |
| Masked Aqua SCA                          | 50.94% | 41.84%                  | 7.22%  | 100.00% |
| Masked Terra SCA                         | 66.93% | 30.18%                  | 6.89%  | 104.00% |
| Delta C Aqua                             | 38.28% | <u>artificial cloud</u> |        |         |
| Delta C Terra                            | 57.65% | <u>artificial cloud</u> |        |         |

| Comparison between source TERRA and processed map |         | cloud removed cumulate | errors       |              | correct      |              |
|---------------------------------------------------|---------|------------------------|--------------|--------------|--------------|--------------|
|                                                   |         |                        | snow to land | land to snow | snow to snow | land to land |
| Step 1 + 2 + 3 + 4 + 5                            | 100.00% |                        | 1.17%        | 2.44%        | 6.50%        | 89.89%       |
| Step 1 + 2 + 3 + 4                                | 99.55%  |                        | 1.17%        | 2.31%        | 6.35%        | 89.72%       |
| Step 1 + 2 + 3                                    | 78.37%  |                        | 0.31%        | 1.19%        | 5.05%        | 71.82%       |
| Step 1 + 2                                        | 66.34%  |                        | 0.30%        | 1.06%        | 3.49%        | 61.48%       |
| Step 1                                            | 34.76%  |                        | 0.26%        | 0.90%        | 2.20%        | 31.40%       |
| Individual steps                                  |         | cloud removed relative | errors       |              | correct      |              |
| Step 5                                            | 0.45%   |                        | 0.00%        | 0.13%        | 0.15%        | 0.17%        |
| Step 4                                            | 21.18%  |                        | 0.86%        | 1.12%        | 1.30%        | 17.90%       |
| Step 3                                            | 12.03%  |                        | 0.01%        | 0.13%        | 1.56%        | 10.34%       |
| Step 2                                            | 31.58%  |                        | 0.04%        | 0.16%        | 1.29%        | 30.08%       |
| Step 1                                            | 34.76%  |                        | 0.26%        | 0.90%        | 2.20%        | 31.40%       |
| Overall                                           | 100.00% |                        | 1.17%        | 2.44%        | 6.50%        | 89.89%       |
|                                                   |         |                        | 3.61%        |              | 96.39%       |              |
