# Supplementary material for: Cloud obstruction and snow cover in Alpine areas from MODIS products
Source: Copernicus journal article supplement (doi:10.5194/hess-18-4579-2014), 2014-11-24
Supplement: Supplementary file 5 [file hess-18-4579-2014-supplement.zip]

| CLOUD FREE DAY 166 WITH CLOUD OF DAY 276 | C      | L                       | S     | TOT     |
|------------------------------------------|--------|-------------------------|-------|---------|
| Source Aqua SCA                          | 12.78% | 86.88%                  | 0.33% | 99.99%  |
| Source Terra SCA                         | 9.86%  | 89.42%                  | 0.72% | 100.00% |
| Masked Aqua SCA                          | 96.10% | 3.90%                   | 0.00% | 100.00% |
| Masked Terra SCA                         | 93.29% | 6.71%                   | 0.00% | 100.00% |
| Delta C Aqua                             | 83.32% | <u>artificial cloud</u> |       |         |
| Delta C Terra                            | 83.43% | <u>artificial cloud</u> |       |         |

| Comparison between source TERRA and processed map |                        | errors       |              | correct      |              |
|---------------------------------------------------|------------------------|--------------|--------------|--------------|--------------|
|                                                   | cloud removed cumulate | snow to land | land to snow | snow to snow | land to land |
| Step 1 + 2 + 3 + 4 + 5                            | 100.00%                | 0.36%        | 0.08%        | 0.50%        | 99.06%       |
| Step 1 + 2 + 3 + 4                                | 100.00%                | 0.36%        | 0.08%        | 0.50%        | 99.06%       |
| Step 1 + 2 + 3                                    | 55.93%                 | 0.04%        | 0.03%        | 0.01%        | 55.87%       |
| Step 1 + 2                                        | 52.66%                 | 0.04%        | 0.00%        | 0.02%        | 52.60%       |
| Step 1                                            | 2.32%                  | 0.00%        | 0.00%        | 0.00%        | 2.32%        |
| Individual steps                                  |                        | errors       |              | correct      |              |
|                                                   | cloud removed relative |              |              |              |              |
| Step 5                                            | 0.00%                  | 0.00%        | 0.00%        | 0.00%        | 0.00%        |
| Step 4                                            | 44.07%                 | 0.32%        | 0.05%        | 0.49%        | 43.19%       |
| Step 3                                            | 3.27%                  | 0.00%        | 0.03%        | -0.01%       | 3.27%        |
| Step 2                                            | 50.34%                 | 0.04%        | 0.00%        | 0.02%        | 50.28%       |
| Step 1                                            | 2.32%                  | 0.00%        | 0.00%        | 0.00%        | 2.32%        |
| Overall                                           | 100.00%                | 0.36%        | 0.08%        | 0.50%        | 99.06%       |
|                                                   |                        | 0.44%        |              | 99.56%       |              |
