# Supplementary material for: Cloud obstruction and snow cover in Alpine areas from MODIS products
Source: Copernicus journal article supplement (doi:10.5194/hess-18-4579-2014), 2014-11-24
Supplement: Supplementary file 6 [file hess-18-4579-2014-supplement.zip]

Validation 2009 - 5 DAYS

**CLOUD FREE DAY 121 WITH CLOUD OF DAY 69**

|                  | C      | L      | S      | TOT     |
|------------------|--------|--------|--------|---------|
| Source Aqua SCA  | 13.96% | 74.02% | 12.02% | 100.00% |
| Source Terra SCA | 6.42%  | 78.41% | 15.17% | 100.00% |
| Masked Aqua SCA  | 93.98% | 5.72%  | 0.30%  | 100.00% |
| Masked Terra SCA | 85.72% | 14.23% | 0.05%  | 100.00% |
| Delta C Aqua     | 80.02% |        |        |         |
| Delta C Terra    | 79.30% |        |        |         |

artificial cloud  
artificial cloud

**Comparison between source TERRA and processed map**

|                        | cloud removed cumulate | errors       |              | correct      |              |
|------------------------|------------------------|--------------|--------------|--------------|--------------|
|                        |                        | snow to land | land to snow | snow to snow | land to land |
| Step 1 + 2 + 3 + 4 + 5 | 100.00%                | 0.61%        | 2.12%        | 18.46%       | 78.81%       |
| Step 1 + 2 + 3 + 4     | 96.32%                 | 0.44%        | 2.08%        | 17.05%       | 76.76%       |
| Step 1 + 2 + 3         | 92.65%                 | 0.33%        | 0.43%        | 15.79%       | 76.11%       |
| Step 1 + 2             | 87.92%                 | 0.33%        | 0.42%        | 13.51%       | 73.67%       |
| Step 1                 | 6.68%                  | 0.01%        | 0.01%        | 0.31%        | 6.35%        |

**Individual steps**

|         | cloud removed relative | errors |       | correct |        |
|---------|------------------------|--------|-------|---------|--------|
| Step 5  | 3.68%                  | 0.17%  | 0.04% | 1.41%   | 2.05%  |
| Step 4  | 3.67%                  | 0.11%  | 1.65% | 1.26%   | 0.65%  |
| Step 3  | 4.73%                  | 0.00%  | 0.01% | 2.28%   | 2.44%  |
| Step 2  | 81.24%                 | 0.32%  | 0.41% | 13.20%  | 67.32% |
| Step 1  | 6.68%                  | 0.01%  | 0.01% | 0.31%   | 6.35%  |
| Overall | 100.00%                | 0.61%  | 2.12% | 18.46%  | 78.81% |
|         |                        | 2.73%  |       | 97.27%  |        |
