# Supplementary material for: Cloud obstruction and snow cover in Alpine areas from MODIS products
Source: Copernicus journal article supplement (doi:10.5194/hess-18-4579-2014), 2014-11-24
Supplement: Supplementary file 7 [file hess-18-4579-2014-supplement.zip]

**Validation 2004 - 6 DAYS**

**CLOUD FREE DAY 345 WITH CLOUD OF DAY 351**

|                  | C      | L                       | S      | TOT     |
|------------------|--------|-------------------------|--------|---------|
| Source Aqua SCA  | 9.61%  | 67.20%                  | 23.18% | 99.99%  |
| Source Terra SCA | 6.93%  | 76.95%                  | 16.11% | 99.99%  |
| Masked Aqua SCA  | 84.03% | 11.29%                  | 4.69%  | 100.01% |
| Masked Terra SCA | 82.42% | 12.87%                  | 4.71%  | 100.00% |
| Delta C Aqua     | 74.42% | <u>artificial cloud</u> |        |         |
| Delta C Terra    | 75.49% | <u>artificial cloud</u> |        |         |

**Comparison between source TERRA and processed map**

|                        | cloud removed cumulate | <b>errors</b> |              | <b>correct</b> |              |
|------------------------|------------------------|---------------|--------------|----------------|--------------|
|                        |                        | snow to land  | land to snow | snow to snow   | land to land |
| Step 1 + 2 + 3 + 4 + 5 | 100.00%                | 0.69%         | 3.82%        | 14.51%         | 80.98%       |
| Step 1 + 2 + 3 + 4     | 90.21%                 | 0.61%         | 3.43%        | 14.35%         | 71.83%       |
| Step 1 + 2 + 3         | 85.65%                 | 0.46%         | 1.91%        | 13.13%         | 70.15%       |
| Step 1 + 2             | 79.44%                 | 0.46%         | 1.78%        | 12.16%         | 65.04%       |
| Step 1                 | 7.00%                  | 0.06%         | 0.76%        | 1.41%          | 4.78%        |
|                        | 0.00%                  | 0.00%         | 0.00%        | 0.00%          | 0.00%        |

**Individual steps**

|         | cloud removed relative | <b>errors</b> |       | <b>correct</b> |        |
|---------|------------------------|---------------|-------|----------------|--------|
| Step 5  | 9.79%                  | 0.08%         | 0.39% | 0.16%          | 9.15%  |
| Step 4  | 4.56%                  | 0.15%         | 1.52% | 1.22%          | 1.68%  |
| Step 3  | 6.21%                  | 0.00%         | 0.13% | 0.97%          | 5.11%  |
| Step 2  | 72.44%                 | 0.40%         | 1.02% | 10.75%         | 60.26% |
| Step 1  | 7.00%                  | 0.06%         | 0.76% | 1.41%          | 4.78%  |
| Overall | 100.00%                | 0.69%         | 3.82% | 14.51%         | 80.98% |
|         |                        | <b>4.51%</b>  |       | <b>95.49%</b>  |        |
