# Supplementary material for: Cloud obstruction and snow cover in Alpine areas from MODIS products
Source: Copernicus journal article supplement (doi:10.5194/hess-18-4579-2014), 2014-11-24
Supplement: Supplementary file 8 [file hess-18-4579-2014-supplement.zip]

Validation 2004 - 6 DAYS

| CLOUD FREE DAY 140 WITH CLOUD OF DAY 143 | C      | L                       | S     | TOT     |
|------------------------------------------|--------|-------------------------|-------|---------|
| Source Aqua SCA                          | 4.84%  | 88.63%                  | 6.53% | 100.00% |
| Source Terra SCA                         | 1.59%  | 90.64%                  | 7.77% | 100.00% |
| Masked Aqua SCA                          | 83.51% | 16.39%                  | 0.10% | 100.00% |
| Masked Terra SCA                         | 90.23% | 9.47%                   | 0.30% | 100.00% |
| Delta C Aqua                             | 78.68% | <u>artificial cloud</u> |       |         |
| Delta C Terra                            | 88.64% | <u>artificial cloud</u> |       |         |

| Comparison between source TERRA and processed map |                        | errors       |              | correct      |              |
|---------------------------------------------------|------------------------|--------------|--------------|--------------|--------------|
|                                                   | cloud removed cumulate | snow to land | land to snow | snow to snow | land to land |
| Step 1 + 2 + 3 + 4 + 5                            | 100.00%                | 1.17%        | 1.11%        | 7.26%        | 90.46%       |
| Step 1 + 2 + 3 + 4                                | 99.99%                 | 1.17%        | 1.11%        | 7.26%        | 90.46%       |
| Step 1 + 2 + 3                                    | 90.39%                 | 0.51%        | 0.63%        | 5.88%        | 83.37%       |
| Step 1 + 2                                        | 89.35%                 | 0.51%        | 0.52%        | 5.14%        | 83.18%       |
| Step 1                                            | 14.87%                 | 0.05%        | 0.01%        | 0.06%        | 14.75%       |
|                                                   | 0.00%                  | 0.00%        | 0.00%        | 0.00%        | 0.00%        |
| Individual steps                                  |                        | errors       |              | correct      |              |
|                                                   | cloud removed relative |              |              |              |              |
| Step 5                                            | 0.01%                  | 0.00%        | 0.00%        | 0.00%        | 0.00%        |
| Step 4                                            | 9.60%                  | 0.66%        | 0.48%        | 1.38%        | 7.09%        |
| Step 3                                            | 1.04%                  | 0.00%        | 0.11%        | 0.74%        | 0.19%        |
| Step 2                                            | 74.48%                 | 0.46%        | 0.51%        | 5.08%        | 68.43%       |
| Step 1                                            | 14.87%                 | 0.05%        | 0.01%        | 0.06%        | 14.75%       |
| Overall                                           | 100.00%                | 1.17%        | 1.11%        | 7.26%        | 90.46%       |
|                                                   |                        | 2.28%        |              | 97.72%       |              |
