# Supplementary material for: Cloud obstruction and snow cover in Alpine areas from MODIS products
Source: Copernicus journal article supplement (doi:10.5194/hess-18-4579-2014), 2014-11-24
Supplement: Supplementary file 9 [file hess-18-4579-2014-supplement.zip]

| CLOUD FREE DAY 335 WITH CLOUD OF DAY 91 | C      | L                       | S     | TOT     |
|-----------------------------------------|--------|-------------------------|-------|---------|
| Source Aqua SCA                         | 6.96%  | 84.94%                  | 8.10% | 100.00% |
| Source Terra SCA                        | 5.18%  | 90.09%                  | 4.72% | 99.99%  |
| Masked Aqua SCA                         | 99.67% | 0.33%                   | 0.00% | 100.00% |
| Masked Terra SCA                        | 96.42% | 3.58%                   | 0.00% | 100.00% |
| Delta C Aqua                            | 92.71% | <u>artificial cloud</u> |       |         |
| Delta C Terra                           | 91.24% | <u>artificial cloud</u> |       |         |

| Comparison between source TERRA and processed map |                        | errors       |              | correct      |              |
|---------------------------------------------------|------------------------|--------------|--------------|--------------|--------------|
|                                                   | cloud removed cumulate | snow to land | land to snow | snow to snow | land to land |
| Step 1 + 2 + 3 + 4 + 5                            | 100.00%                | 0.73%        | 2.76%        | 4.41%        | 92.10%       |
| Step 1 + 2 + 3 + 4                                | 96.41%                 | 0.75%        | 2.69%        | 4.40%        | 88.56%       |
| Step 1 + 2 + 3                                    | 32.88%                 | 0.49%        | 0.83%        | 3.20%        | 28.37%       |
| Step 1 + 2                                        | 32.88%                 | 0.49%        | 0.83%        | 3.20%        | 28.37%       |
| Step 1                                            | 0.30%                  | 0.00%        | 0.00%        | 0.00%        | 0.29%        |
|                                                   | 0.00%                  | 0.00%        | 0.00%        | 0.00%        | 0.00%        |
| Individual steps                                  |                        | errors       |              | correct      |              |
|                                                   | cloud removed relative |              |              |              |              |
| Step 5                                            | 3.59%                  | -0.02%       | 0.07%        | 0.01%        | 3.54%        |
| Step 4                                            | 63.53%                 | 0.26%        | 1.86%        | 1.20%        | 60.19%       |
| Step 3                                            | 0.00%                  | 0.00%        | 0.00%        | 0.00%        | 0.00%        |
| Step 2                                            | 32.58%                 | 0.49%        | 0.83%        | 3.20%        | 28.08%       |
| Step 1                                            | 0.30%                  | 0.00%        | 0.00%        | 0.00%        | 0.29%        |
| Overall                                           | 100.00%                | 0.73%        | 2.76%        | 4.41%        | 92.10%       |
|                                                   |                        | 3.49%        |              | 96.51%       |              |
