# Supplementary material for: Cloud obstruction and snow cover in Alpine areas from MODIS products
Source: Copernicus journal article supplement (doi:10.5194/hess-18-4579-2014), 2014-11-24
Supplement: Supplementary file 10 [file hess-18-4579-2014-supplement.zip]

# Validation 2009 - 5 DAYS

## CLOUD FREE DAY 46 WITH CLOUD OF DAY 34

|                  | C      | L                       | S      | TOT     |
|------------------|--------|-------------------------|--------|---------|
| Source Aqua SCA  | 13.23% | 61.72%                  | 25.05% | 100.00% |
| Source Terra SCA | 7.17%  | 62.25%                  | 30.58% | 100.00% |
| Masked Aqua SCA  | 97.40% | 2.14%                   | 0.46%  | 100.00% |
| Masked Terra SCA | 97.94% | 1.04%                   | 1.02%  | 100.00% |
| Delta C Aqua     | 84.17% | <u>artificial cloud</u> |        |         |
| Delta C Terra    | 90.77% | <u>artificial cloud</u> |        |         |

## Comparison between source TERRA and processed map

|                        | cloud removed cumulate | errors       |              | correct      |              |
|------------------------|------------------------|--------------|--------------|--------------|--------------|
|                        |                        | snow to land | land to snow | snow to snow | land to land |
| Step 1 + 2 + 3 + 4 + 5 | 100.00%                | 1.66%        | 2.60%        | 30.72%       | 65.03%       |
| Step 1 + 2 + 3 + 4     | 99.91%                 | 1.65%        | 2.60%        | 30.65%       | 65.01%       |
| Step 1 + 2 + 3         | 91.21%                 | 1.18%        | 1.52%        | 25.87%       | 62.65%       |
| Step 1 + 2             | 86.38%                 | 0.96%        | 1.40%        | 21.96%       | 62.06%       |
| Step 1                 | 2.30%                  | 0.03%        | 0.07%        | 0.34%        | 1.86%        |

## Individual steps

|         | cloud removed relative | errors |       | correct |        |
|---------|------------------------|--------|-------|---------|--------|
| Step 5  | 0.09%                  | 0.01%  | 0.00% | 0.07%   | 0.02%  |
| Step 4  | 8.70%                  | 0.47%  | 1.08% | 4.78%   | 2.36%  |
| Step 3  | 4.83%                  | 0.22%  | 0.12% | 3.91%   | 0.59%  |
| Step 2  | 84.08%                 | 0.93%  | 1.33% | 21.62%  | 60.20% |
| Step 1  | 2.30%                  | 0.03%  | 0.07% | 0.34%   | 1.86%  |
| Overall | 100.00%                | 1.66%  | 2.60% | 30.72%  | 65.03% |

4.26%

95.75%
