# Supplementary material for: Cloud obstruction and snow cover in Alpine areas from MODIS products
Source: Copernicus journal article supplement (doi:10.5194/hess-18-4579-2014), 2014-11-24
Supplement: Supplementary file 11 [file hess-18-4579-2014-supplement.zip]

Validation 2004 - 6 DAYS

CLOUD FREE DAY 79 WITH CLOUD OF DAY 84

|                  | C      | L                       | S      | TOT     |
|------------------|--------|-------------------------|--------|---------|
| Source Aqua SCA  | 16.00% | 70.03%                  | 13.98% | 100.01% |
| Source Terra SCA | 18.21% | 61.54%                  | 20.25% | 100.00% |
| Masked Aqua SCA  | 94.86% | 4.96%                   | 0.17%  | 99.99%  |
| Masked Terra SCA | 89.74% | 10.10%                  | 0.16%  | 100.00% |
| Delta C Aqua     | 78.87% | <u>artificial cloud</u> |        |         |
| Delta C Terra    | 71.53% | <u>artificial cloud</u> |        |         |

Comparison between source TERRA and processed map

|                        | cloud removed cumulate | errors       |              | correct      |              |
|------------------------|------------------------|--------------|--------------|--------------|--------------|
|                        |                        | snow to land | land to snow | snow to snow | land to land |
| Step 1 + 2 + 3 + 4 + 5 | 100.00%                | 2.12%        | 2.23%        | 25.97%       | 69.69%       |
| Step 1 + 2 + 3 + 4     | 99.98%                 | 2.12%        | 2.23%        | 25.97%       | 69.67%       |
| Step 1 + 2 + 3         | 23.51%                 | 0.27%        | 0.07%        | 7.84%        | 15.32%       |
| Step 1 + 2             | 23.51%                 | 0.27%        | 0.07%        | 7.84%        | 15.32%       |
| Step 1                 | 2.75%                  | 0.02%        | 0.01%        | 0.21%        | 2.52%        |
|                        | 0.00%                  | 0.00%        | 0.00%        | 0.00%        | 0.00%        |
| Individual steps       |                        | errors       |              | correct      |              |
| Step 5                 | 0.02%                  | 0.00%        | 0.00%        | 0.00%        | 0.02%        |
| Step 4                 | 76.47%                 | 1.85%        | 2.16%        | 18.13%       | 54.35%       |
| Step 3                 | 0.00%                  | 0.00%        | 0.00%        | 0.00%        | 0.00%        |
| Step 2                 | 20.76%                 | 0.25%        | 0.07%        | 7.63%        | 12.80%       |
| Step 1                 | 2.75%                  | 0.02%        | 0.01%        | 0.21%        | 2.52%        |
| Overall                | 100.00%                | 2.12%        | 2.23%        | 25.97%       | 69.69%       |
|                        |                        | 4.35%        |              | 95.66%       |              |
