# Supplementary material for: Cloud obstruction and snow cover in Alpine areas from MODIS products
Source: Copernicus journal article supplement (doi:10.5194/hess-18-4579-2014), 2014-11-24
Supplement: Supplementary file 12 [file hess-18-4579-2014-supplement.zip]

Validation 2009 - 5 DAYS

CLOUD FREE DAY 315 WITH CLOUD OF DAY 333

|                  | C      | L                       | S      | TOT     |
|------------------|--------|-------------------------|--------|---------|
| Source Aqua SCA  | 5.18%  | 73.81%                  | 21.01% | 100.00% |
| Source Terra SCA | 2.67%  | 78.60%                  | 18.73% | 100.00% |
| Masked Aqua SCA  | 99.36% | 0.62%                   | 0.01%  | 99.99%  |
| Masked Terra SCA | 98.68% | 1.31%                   | 0.01%  | 100.00% |
| Delta C Aqua     | 94.18% | <u>artificial cloud</u> |        |         |
| Delta C Terra    | 96.01% | <u>artificial cloud</u> |        |         |

Comparison between source TERRA and processed map

|                        | cloud removed cumulate | errors       |              | correct      |              |
|------------------------|------------------------|--------------|--------------|--------------|--------------|
|                        |                        | snow to land | land to snow | snow to snow | land to land |
| Step 1 + 2 + 3 + 4 + 5 | 100.00%                | 2.05%        | 4.65%        | 17.45%       | 75.85%       |
| Step 1 + 2 + 3 + 4     | 95.93%                 | 1.63%        | 4.63%        | 16.83%       | 72.84%       |
| Step 1 + 2 + 3         | 84.51%                 | 0.43%        | 1.31%        | 15.04%       | 67.73%       |
| Step 1 + 2             | 63.84%                 | 0.42%        | 1.16%        | 11.75%       | 50.51%       |
| Step 1                 | 0.54%                  | 0.00%        | 0.01%        | 0.00%        | 0.53%        |
|                        | 0.00%                  | 0.00%        | 0.00%        | 0.00%        | 0.00%        |
| Individual steps       |                        | errors       |              | correct      |              |
|                        | cloud removed relative |              |              |              |              |
| Step 5                 | 4.07%                  | 0.42%        | 0.02%        | 0.62%        | 3.01%        |
| Step 4                 | 11.42%                 | 1.20%        | 3.32%        | 1.79%        | 5.11%        |
| Step 3                 | 20.67%                 | 0.01%        | 0.15%        | 3.29%        | 17.22%       |
| Step 2                 | 63.30%                 | 0.42%        | 1.15%        | 11.75%       | 49.98%       |
| Step 1                 | 0.54%                  | 0.00%        | 0.01%        | 0.00%        | 0.53%        |
| Overall                | 100.00%                | 2.05%        | 4.65%        | 17.45%       | 75.85%       |
|                        |                        | 6.70%        |              | 93.30%       |              |
