# Supplementary material for: Cloud obstruction and snow cover in Alpine areas from MODIS products
Source: Copernicus journal article supplement (doi:10.5194/hess-18-4579-2014), 2014-11-24
Supplement: Supplementary file 13 [file hess-18-4579-2014-supplement.zip]

# Validation 2012 - 4 DAYS

## CLOUD FREE DAY 63 WITH CLOUD OF DAY 22

|                  | C      | L      | S     | TOT     |
|------------------|--------|--------|-------|---------|
| Source Aqua SCA  | 13.88% | 77.66% | 8.46% | 100.00% |
| Source Terra SCA | 7.52%  | 82.91% | 9.57% | 100.00% |
| Masked Aqua SCA  | 77.62% | 21.86% | 0.53% | 100.01% |
| Masked Terra SCA | 91.57% | 7.93%  | 0.50% | 100.00% |
| Delta C Aqua     | 63.74% |        |       |         |
| Delta C Terra    | 84.05% |        |       |         |

artificial cloud

artificial cloud

## Comparison between source TERRA and processed map

|                        | cloud removed cumulate | errors       |              | correct      |              |
|------------------------|------------------------|--------------|--------------|--------------|--------------|
|                        |                        | snow to land | land to snow | snow to snow | land to land |
| Step 1 + 2 + 3 + 4 + 5 | 100.00%                | 0.62%        | 2.06%        | 10.17%       | 87.15%       |
| Step 1 + 2 + 3 + 4     | 100.00%                | 0.62%        | 2.06%        | 10.17%       | 87.15%       |
| Step 1 + 2 + 3         | 56.57%                 | 0.10%        | 0.56%        | 3.72%        | 52.20%       |
| Step 1 + 2             | 50.15%                 | 0.10%        | 0.49%        | 2.75%        | 46.82%       |
| Step 1                 | 23.13%                 | 0.04%        | 0.26%        | 0.22%        | 22.61%       |

## Individual steps

|         | cloud removed relative | errors |       | correct |        |
|---------|------------------------|--------|-------|---------|--------|
| Step 5  | 0.00%                  | 0.00%  | 0.00% | 0.00%   | 0.00%  |
| Step 4  | 43.43%                 | 0.52%  | 1.50% | 6.45%   | 34.95% |
| Step 3  | 6.42%                  | 0.00%  | 0.07% | 0.97%   | 5.38%  |
| Step 2  | 27.02%                 | 0.06%  | 0.23% | 2.53%   | 24.21% |
| Step 1  | 23.13%                 | 0.04%  | 0.26% | 0.22%   | 22.61% |
| Overall | 100.00%                | 0.62%  | 2.06% | 10.17%  | 87.15% |

**2.68%**

**97.32%**
