# Supplementary material for: Cloud obstruction and snow cover in Alpine areas from MODIS products
Source: Copernicus journal article supplement (doi:10.5194/hess-18-4579-2014), 2014-11-24
Supplement: Supplementary file 14 [file hess-18-4579-2014-supplement.zip]

| CLOUD FREE DAY 312 WITH CLOUD OF DAY 357 | C       | L                       | S      | TOT     |
|------------------------------------------|---------|-------------------------|--------|---------|
| Source Aqua SCA                          | 6.59%   | 74.03%                  | 19.37% | 99.99%  |
| Source Terra SCA                         | 5.57%   | 85.20%                  | 9.22%  | 99.99%  |
| Masked Aqua SCA                          | 100.00% | 0.00%                   | 0.00%  | 100.00% |
| Masked Terra SCA                         | 97.52%  | 2.48%                   | 0.00%  | 100.00% |
| Delta C Aqua                             | 93.41%  | <u>artificial cloud</u> |        |         |
| Delta C Terra                            | 91.95%  | <u>artificial cloud</u> |        |         |

| Comparison between source TERRA and processed map |                        | errors       |              | correct      |              |
|---------------------------------------------------|------------------------|--------------|--------------|--------------|--------------|
|                                                   | cloud removed cumulate | snow to land | land to snow | snow to snow | land to land |
| Step 1 + 2 + 3 + 4 + 5                            | 100.00%                | 0.80%        | 2.70%        | 9.24%        | 87.27%       |
| Step 1 + 2 + 3 + 4                                | 99.74%                 | 0.78%        | 2.68%        | 9.21%        | 87.07%       |
| Step 1 + 2 + 3                                    | 91.89%                 | 0.49%        | 1.08%        | 7.55%        | 82.78%       |
| Step 1 + 2                                        | 87.97%                 | 0.48%        | 0.95%        | 5.67%        | 80.87%       |
| Step 1                                            | 0.00%                  | 0.00%        | 0.00%        | 0.00%        | 0.00%        |
| Individual steps                                  |                        | errors       |              | correct      |              |
|                                                   | cloud removed relative |              |              |              |              |
| Step 5                                            | 0.26%                  | 0.02%        | 0.02%        | 0.03%        | 0.20%        |
| Step 4                                            | 7.85%                  | 0.29%        | 1.60%        | 1.66%        | 4.29%        |
| Step 3                                            | 3.92%                  | 0.01%        | 0.13%        | 1.88%        | 1.91%        |
| Step 2                                            | 87.97%                 | 0.48%        | 0.95%        | 5.67%        | 80.87%       |
| Step 1                                            | 0.00%                  | 0.00%        | 0.00%        | 0.00%        | 0.00%        |
| Overall                                           | 100.00%                | 0.80%        | 2.70%        | 9.24%        | 87.27%       |
|                                                   |                        | 3.50%        |              | 96.51%       |              |
