# Supplementary material for: Cloud obstruction and snow cover in Alpine areas from MODIS products
Source: Copernicus journal article supplement (doi:10.5194/hess-18-4579-2014), 2014-11-24
Supplement: Supplementary file 15 [file hess-18-4579-2014-supplement.zip]

| CLOUD FREE DAY 90 WITH CLOUD OF DAY 292 | C      | L      | S      | TOT     |
|-----------------------------------------|--------|--------|--------|---------|
| Source Aqua SCA                         | 13.90% | 73.57% | 12.53% | 100.00% |
| Source Terra SCA                        | 14.52% | 69.97% | 15.51% | 100.00% |
| Masked Aqua SCA                         | 99.12% | 0.78%  | 0.10%  | 100.00% |
| Masked Terra SCA                        | 99.34% | 0.65%  | 0.00%  | 99.99%  |
| Delta C Aqua                            | 85.22% |        |        |         |
| Delta C Terra                           | 84.82% |        |        |         |

artificial cloud  
artificial cloud

| Comparison between source TERRA and processed map | cloud removed cumulate | errors       |              | correct      |              |
|---------------------------------------------------|------------------------|--------------|--------------|--------------|--------------|
|                                                   |                        | snow to land | land to snow | snow to snow | land to land |
| Step 1 + 2 + 3 + 4 + 5                            | 100.00%                | 1.06%        | 2.38%        | 17.22%       | 79.34%       |
| Step 1 + 2 + 3 + 4                                | 99.43%                 | 1.03%        | 2.26%        | 17.02%       | 79.12%       |
| Step 1 + 2 + 3                                    | 9.87%                  | 0.02%        | 0.01%        | 0.32%        | 9.52%        |
| Step 1 + 2                                        | 9.87%                  | 0.02%        | 0.01%        | 0.32%        | 9.52%        |
| Step 1                                            | 0.94%                  | 0.00%        | 0.01%        | 0.10%        | 0.83%        |
| Individual steps                                  | cloud removed relative | errors       |              | correct      |              |
|                                                   |                        | snow to land | land to snow | snow to snow | land to land |
| Step 5                                            | 0.57%                  | 0.03%        | 0.12%        | 0.20%        | 0.22%        |
| Step 4                                            | 89.56%                 | 1.01%        | 2.25%        | 16.70%       | 69.60%       |
| Step 3                                            | 0.00%                  | 0.00%        | 0.00%        | 0.00%        | 0.00%        |
| Step 2                                            | 8.93%                  | 0.02%        | 0.00%        | 0.22%        | 8.69%        |
| Step 1                                            | 0.94%                  | 0.00%        | 0.01%        | 0.10%        | 0.83%        |
| Overall                                           | 100.00%                | 1.06%        | 2.38%        | 17.22%       | 79.34%       |
|                                                   |                        | 3.44%        |              | 96.56%       |              |
