# Supplementary material for: Cloud obstruction and snow cover in Alpine areas from MODIS products
Source: Copernicus journal article supplement (doi:10.5194/hess-18-4579-2014), 2014-11-24
Supplement: Supplementary file 16 [file hess-18-4579-2014-supplement.zip]

Validation 2009 - 5 DAYS

CLOUD FREE DAY 143 WITH CLOUD OF DAY 317

|                  | C      | L                       | S     | TOT     |
|------------------|--------|-------------------------|-------|---------|
| Source Aqua SCA  | 13.09% | 83.29%                  | 3.62% | 100.00% |
| Source Terra SCA | 5.95%  | 90.15%                  | 3.89% | 99.99%  |
| Masked Aqua SCA  | 99.86% | 0.14%                   | 0.00% | 100.00% |
| Masked Terra SCA | 91.82% | 8.04%                   | 0.14% | 100.00% |
| Delta C Aqua     | 86.77% | <u>artificial cloud</u> |       |         |
| Delta C Terra    | 85.87% | <u>artificial cloud</u> |       |         |

Comparison between source TERRA and processed map

|                        |                        | errors       |              | correct      |              |
|------------------------|------------------------|--------------|--------------|--------------|--------------|
|                        | cloud removed cumulate | snow to land | land to snow | snow to snow | land to land |
| Step 1 + 2 + 3 + 4 + 5 | 100.00%                | 0.22%        | 3.63%        | 4.16%        | 91.99%       |
| Step 1 + 2 + 3 + 4     | 98.61%                 | 0.22%        | 2.89%        | 3.73%        | 91.77%       |
| Step 1 + 2 + 3         | 90.08%                 | 0.08%        | 0.82%        | 1.80%        | 87.38%       |
| Step 1 + 2             | 80.18%                 | 0.08%        | 0.82%        | 1.80%        | 77.48%       |
| Step 1                 | 0.09%                  | 0.00%        | 0.00%        | 0.00%        | 0.09%        |
| Individual steps       |                        | errors       |              | correct      |              |
|                        | cloud removed relative |              |              |              |              |
| Step 5                 | 1.39%                  | 0.00%        | 0.74%        | 0.43%        | 0.22%        |
| Step 4                 | 8.53%                  | 0.14%        | 2.07%        | 1.93%        | 4.39%        |
| Step 3                 | 90.08%                 | 0.00%        | 0.00%        | 0.00%        | 9.90%        |
| Step 2                 | 80.09%                 | 0.08%        | 0.82%        | 1.80%        | 77.39%       |
| Step 1                 | 0.09%                  | 0.00%        | 0.00%        | 0.00%        | 0.09%        |
| Overall                | 180.18%                | 0.22%        | 3.63%        | 4.16%        | 91.99%       |
|                        |                        | 3.85%        |              | 96.15%       |              |
