# Supplementary material for: Cloud obstruction and snow cover in Alpine areas from MODIS products
Source: Copernicus journal article supplement (doi:10.5194/hess-18-4579-2014), 2014-11-24
Supplement: Supplementary file 17 [file hess-18-4579-2014-supplement.zip]

# Validation 2004 - 6 DAYS

## CLOUD FREE DAY 112 WITH CLOUD OF DAY 120

|                  | C      | L                       | S      | TOT     |
|------------------|--------|-------------------------|--------|---------|
| Source Aqua SCA  | 20.03% | 68.03%                  | 11.94% | 100.00% |
| Source Terra SCA | 11.44% | 75.64%                  | 12.92% | 100.00% |
| Masked Aqua SCA  | 97.15% | 2.80%                   | 0.05%  | 100.00% |
| Masked Terra SCA | 97.16% | 2.83%                   | 0.01%  | 100.00% |
| Delta C Aqua     | 77.12% | <u>artificial cloud</u> |        |         |
| Delta C Terra    | 85.72% | <u>artificial cloud</u> |        |         |

## Comparison between source TERRA and processed map

|                        | cloud removed cumulate | errors       |              | correct      |              |
|------------------------|------------------------|--------------|--------------|--------------|--------------|
|                        |                        | snow to land | land to snow | snow to snow | land to land |
| Step 1 + 2 + 3 + 4 + 5 | 100.00%                | 0.25%        | 3.62%        | 14.86%       | 81.26%       |
| Step 1 + 2 + 3 + 4     | 94.53%                 | 0.09%        | 3.51%        | 13.78%       | 77.14%       |
| Step 1 + 2 + 3         | 86.67%                 | 0.04%        | 0.38%        | 10.65%       | 75.60%       |
| Step 1 + 2             | 83.69%                 | 0.04%        | 0.34%        | 8.48%        | 74.82%       |
| Step 1                 | 2.56%                  | 0.01%        | 0.03%        | 0.00%        | 2.52%        |
|                        | 0.00%                  | 0.00%        | 0.00%        | 0.00%        | 0.00%        |

## Individual steps

|         | cloud removed relative | errors |       | correct |        |
|---------|------------------------|--------|-------|---------|--------|
| Step 5  | 5.47%                  | 0.16%  | 0.11% | 1.08%   | 4.12%  |
| Step 4  | 7.86%                  | 0.05%  | 3.13% | 3.13%   | 1.54%  |
| Step 3  | 2.98%                  | 0.00%  | 0.04% | 2.17%   | 0.78%  |
| Step 2  | 81.13%                 | 0.04%  | 0.31% | 8.48%   | 72.30% |
| Step 1  | 2.56%                  | 0.01%  | 0.03% | 0.00%   | 2.52%  |
| Overall | 100.00%                | 0.25%  | 3.62% | 14.86%  | 81.26% |
|         |                        | 3.87%  |       | 96.12%  |        |
