# Supplementary material for: Cloud obstruction and snow cover in Alpine areas from MODIS products
Source: Copernicus journal article supplement (doi:10.5194/hess-18-4579-2014), 2014-11-24
Supplement: Supplementary file 18 [file hess-18-4579-2014-supplement.zip]

# Validation 2005 - 2 DAYS

## CLOUD FREE DAY 116 WITH CLOUD OF DAY 294

|                  | C      | L                       | S      | TOT     |
|------------------|--------|-------------------------|--------|---------|
| Source Aqua SCA  | 6.76%  | 80.44%                  | 12.79% | 99.99%  |
| Source Terra SCA | 4.48%  | 83.52%                  | 12.00% | 100.00% |
| Masked Aqua SCA  | 96.92% | 2.98%                   | 0.11%  | 100.01% |
| Masked Terra SCA | 97.48% | 2.15%                   | 0.37%  | 100.00% |
| Delta C Aqua     | 90.20% | <u>artificial cloud</u> |        |         |
| Delta C Terra    | 93.00% | <u>artificial cloud</u> |        |         |

## Comparison between source TERRA and processed map

|                        | cloud removed cumulate | errors       |              | correct      |              |
|------------------------|------------------------|--------------|--------------|--------------|--------------|
|                        |                        | snow to land | land to snow | snow to snow | land to land |
| Step 1 + 2 + 3 + 4 + 5 | 100.00%                | 0.63%        | 2.66%        | 11.87%       | 84.83%       |
| Step 1 + 2 + 3 + 4     | 96.46%                 | 0.33%        | 2.52%        | 11.53%       | 82.08%       |
| Step 1 + 2 + 3         | 28.59%                 | 0.02%        | 0.05%        | 0.74%        | 27.78%       |
| Step 1 + 2             | 28.59%                 | 0.02%        | 0.05%        | 0.74%        | 27.78%       |
| Step 1                 | 3.14%                  | 0.01%        | 0.00%        | 0.07%        | 3.06%        |
|                        | 0.00%                  | 0.00%        | 0.00%        | 0.00%        | 0.00%        |

## Individual steps

|         | cloud removed relative | errors |       | correct |        |
|---------|------------------------|--------|-------|---------|--------|
| Step 5  | 3.54%                  | 0.30%  | 0.14% | 0.34%   | 2.75%  |
| Step 4  | 67.87%                 | 0.31%  | 2.47% | 10.79%  | 54.30% |
| Step 3  | 0.00%                  | 0.00%  | 0.00% | 0.00%   | 0.00%  |
| Step 2  | 25.45%                 | 0.01%  | 0.04% | 0.67%   | 24.72% |
| Step 1  | 3.14%                  | 0.01%  | 0.00% | 0.07%   | 3.06%  |
| Overall | 100.00%                | 0.63%  | 2.66% | 11.87%  | 84.83% |
|         |                        | 3.29%  |       | 96.70%  |        |
