# Supplementary material for: Cloud obstruction and snow cover in Alpine areas from MODIS products
Source: Copernicus journal article supplement (doi:10.5194/hess-18-4579-2014), 2014-11-24
Supplement: Supplementary file 19 [file hess-18-4579-2014-supplement.zip]

Validation 2004 - 6 DAYS

| CLOUD FREE DAY 36 WITH CLOUD OF DAY 33 | C      | L                       | S      | TOT     |
|----------------------------------------|--------|-------------------------|--------|---------|
| Source Aqua SCA                        | 11.45% | 70.28%                  | 18.28% | 100.01% |
| Source Terra SCA                       | 9.41%  | 68.86%                  | 21.74% | 100.01% |
| Masked Aqua SCA                        | 86.55% | 8.61%                   | 4.84%  | 100.00% |
| Masked Terra SCA                       | 95.94% | 0.82%                   | 3.24%  | 100.00% |
| Delta C Aqua                           | 75.11% | <u>artificial cloud</u> |        |         |
| Delta C Terra                          | 86.53% | <u>artificial cloud</u> |        |         |

| Comparison between source TERRA and processed map |         | cloud removed cumulate |  | errors       |              | correct      |              |
|---------------------------------------------------|---------|------------------------|--|--------------|--------------|--------------|--------------|
|                                                   |         |                        |  | snow to land | land to snow | snow to snow | land to land |
| Step 1 + 2 + 3 + 4 + 5                            | 100.00% |                        |  | 1.35%        | 5.49%        | 19.91%       | 73.24%       |
| Step 1 + 2 + 3 + 4                                | 99.40%  |                        |  | 1.54%        | 5.24%        | 19.82%       | 72.79%       |
| Step 1 + 2 + 3                                    | 70.64%  |                        |  | 0.72%        | 0.60%        | 11.08%       | 58.24%       |
| Step 1 + 2                                        | 56.77%  |                        |  | 0.65%        | 0.59%        | 8.76%        | 46.77%       |
| Step 1                                            | 11.70%  |                        |  | 0.22%        | 0.28%        | 2.71%        | 8.48%        |
|                                                   | 0.00%   |                        |  | 0.00%        | 0.00%        | 0.00%        | 0.00%        |
| Individual steps                                  |         | cloud removed relative |  | errors       |              | correct      |              |
| Step 5                                            | 0.60%   |                        |  | -0.19%       | 0.25%        | 0.09%        | 0.45%        |
| Step 4                                            | 28.76%  |                        |  | 0.82%        | 4.64%        | 8.74%        | 14.55%       |
| Step 3                                            | 13.87%  |                        |  | 0.07%        | 0.01%        | 2.32%        | 11.47%       |
| Step 2                                            | 45.07%  |                        |  | 0.43%        | 0.31%        | 6.05%        | 38.29%       |
| Step 1                                            | 11.70%  |                        |  | 0.22%        | 0.28%        | 2.71%        | 8.48%        |
| Overall                                           | 100.00% |                        |  | 1.35%        | 5.49%        | 19.91%       | 73.24%       |
|                                                   |         |                        |  | 6.84%        |              | 93.15%       |              |
