# Supplementary material for: Cloud obstruction and snow cover in Alpine areas from MODIS products
Source: Copernicus journal article supplement (doi:10.5194/hess-18-4579-2014), 2014-11-24
Supplement: Supplementary file 20 [file hess-18-4579-2014-supplement.zip]

| CLOUD FREE DAY 92 WITH CLOUD OF DAY 343 | C      | L                       | S      | TOT     |
|-----------------------------------------|--------|-------------------------|--------|---------|
| Source Aqua SCA                         | 8.25%  | 79.95%                  | 11.81% | 100.01% |
| Source Terra SCA                        | 3.09%  | 85.06%                  | 11.85% | 100.00% |
| Masked Aqua SCA                         | 98.42% | 1.13%                   | 0.45%  | 100.00% |
| Masked Terra SCA                        | 98.57% | 1.34%                   | 0.09%  | 100.00% |
| Delta C Aqua                            | 90.17% | <u>artificial cloud</u> |        |         |
| Delta C Terra                           | 95.48% | <u>artificial cloud</u> |        |         |

| Comparison between source TERRA and processed map |                        | errors       |              | correct      |              |
|---------------------------------------------------|------------------------|--------------|--------------|--------------|--------------|
|                                                   | cloud removed cumulate | snow to land | land to snow | snow to snow | land to land |
| Step 1 + 2 + 3 + 4 + 5                            | 100.00%                | 0.19%        | 3.04%        | 12.12%       | 84.65%       |
| Step 1 + 2 + 3 + 4                                | 97.52%                 | 0.13%        | 2.20%        | 11.44%       | 83.75%       |
| Step 1 + 2 + 3                                    | 94.86%                 | 0.07%        | 1.07%        | 10.64%       | 83.08%       |
| Step 1 + 2                                        | 93.64%                 | 0.07%        | 0.99%        | 9.76%        | 82.82%       |
| Step 1                                            | 1.59%                  | 0.01%        | 0.03%        | 0.41%        | 1.14%        |
| Individual steps                                  |                        | errors       |              | correct      |              |
|                                                   | cloud removed relative |              |              |              |              |
| Step 5                                            | 2.48%                  | 0.06%        | 0.84%        | 0.68%        | 0.90%        |
| Step 4                                            | 2.66%                  | 0.06%        | 1.13%        | 0.80%        | 0.67%        |
| Step 3                                            | 1.22%                  | 0.00%        | 0.08%        | 0.88%        | 0.26%        |
| Step 2                                            | 92.05%                 | 0.06%        | 0.96%        | 9.35%        | 81.68%       |
| Step 1                                            | 1.59%                  | 0.01%        | 0.03%        | 0.41%        | 1.14%        |
| Overall                                           | 100.00%                | 0.19%        | 3.04%        | 12.12%       | 84.65%       |
|                                                   |                        | 3.23%        |              | 96.77%       |              |
