# Supplementary material for: Cloud obstruction and snow cover in Alpine areas from MODIS products
Source: Copernicus journal article supplement (doi:10.5194/hess-18-4579-2014), 2014-11-24
Supplement: Supplementary file 21 [file hess-18-4579-2014-supplement.zip]

| CLOUD FREE DAY 270 WITH CLOUD OF DAY 325 | C      | L                       | S     | TOT     |
|------------------------------------------|--------|-------------------------|-------|---------|
| Source Aqua SCA                          | 7.53%  | 90.73%                  | 1.75% | 100.01% |
| Source Terra SCA                         | 2.80%  | 96.19%                  | 1.01% | 100.00% |
| Masked Aqua SCA                          | 94.98% | 4.92%                   | 0.10% | 100.00% |
| Masked Terra SCA                         | 90.87% | 8.99%                   | 0.14% | 100.00% |
| Delta C Aqua                             | 87.45% | <u>artificial cloud</u> |       |         |
| Delta C Terra                            | 88.07% | <u>artificial cloud</u> |       |         |

| Comparison between source TERRA and processed map |         | cloud removed cumulate | errors       |              | correct      |              |
|---------------------------------------------------|---------|------------------------|--------------|--------------|--------------|--------------|
|                                                   |         |                        | snow to land | land to snow | snow to snow | land to land |
| Step 1 + 2 + 3 + 4 + 5                            | 100.00% |                        | 0.49%        | 2.26%        | 0.50%        | 96.75%       |
| Step 1 + 2 + 3 + 4                                | 94.97%  |                        | 0.49%        | 2.25%        | 0.48%        | 91.75%       |
| Step 1 + 2 + 3                                    | 19.87%  |                        | 0.02%        | 0.08%        | 0.10%        | 19.67%       |
| Step 1 + 2                                        | 19.87%  |                        | 0.02%        | 0.08%        | 0.10%        | 19.67%       |
| Step 1                                            | 2.59%   |                        | 0.02%        | 0.03%        | 0.04%        | 2.49%        |
|                                                   | 0.00%   |                        | 0.00%        | 0.00%        | 0.00%        | 0.00%        |
| Individual steps                                  |         | cloud removed relative | errors       |              | correct      |              |
| Step 5                                            | 5.03%   |                        | 0.00%        | 0.01%        | 0.02%        | 5.00%        |
| Step 4                                            | 75.10%  |                        | 0.47%        | 2.17%        | 0.38%        | 72.08%       |
| Step 3                                            | 0.00%   |                        | 0.00%        | 0.00%        | 0.00%        | 0.00%        |
| Step 2                                            | 17.28%  |                        | 0.00%        | 0.05%        | 0.06%        | 17.18%       |
| Step 1                                            | 2.59%   |                        | 0.02%        | 0.03%        | 0.04%        | 2.49%        |
| Overall                                           | 100.00% |                        | 0.49%        | 2.26%        | 0.50%        | 96.75%       |
|                                                   |         |                        | 2.75%        |              | 97.25%       |              |
