# Supplementary material for: Cloud obstruction and snow cover in Alpine areas from MODIS products
Source: Copernicus journal article supplement (doi:10.5194/hess-18-4579-2014), 2014-11-24
Supplement: Supplementary file 22 [file hess-18-4579-2014-supplement.zip]

| CLOUD FREE DAY 138 WITH CLOUD OF DAY 323 | C      | L                       | S     | TOT     |
|------------------------------------------|--------|-------------------------|-------|---------|
| Source Aqua SCA                          | 8.97%  | 86.22%                  | 4.81% | 100.00% |
| Source Terra SCA                         | 1.70%  | 91.82%                  | 6.47% | 99.99%  |
| Masked Aqua SCA                          | 97.45% | 1.96%                   | 0.59% | 100.00% |
| Masked Terra SCA                         | 97.70% | 1.99%                   | 0.31% | 100.00% |
| Delta C Aqua                             | 88.48% | <u>artificial cloud</u> |       |         |
| Delta C Terra                            | 96.00% | <u>artificial cloud</u> |       |         |

| Comparison between source TERRA and processed map | cloud removed cumulate | errors       |              | correct      |              |
|---------------------------------------------------|------------------------|--------------|--------------|--------------|--------------|
|                                                   |                        | snow to land | land to snow | snow to snow | land to land |
| Step 1 + 2 + 3 + 4 + 5                            | 100.00%                | 1.61%        | 1.58%        | 4.86%        | 91.95%       |
| Step 1 + 2 + 3 + 4                                | 100.00%                | 1.61%        | 1.58%        | 4.86%        | 91.95%       |
| Step 1 + 2 + 3                                    | 28.98%                 | 0.38%        | 0.11%        | 0.63%        | 27.85%       |
| Step 1 + 2                                        | 28.98%                 | 0.38%        | 0.11%        | 0.63%        | 27.85%       |
| Step 1                                            | 2.11%                  | 0.27%        | 0.03%        | 0.48%        | 1.33%        |
| Individual steps                                  | cloud removed relative | errors       |              | correct      |              |
| Step 5                                            | 0.00%                  | 0.00%        | 0.00%        | 0.00%        | 0.00%        |
| Step 4                                            | 71.02%                 | 1.23%        | 1.47%        | 4.23%        | 64.10%       |
| Step 3                                            | 0.00%                  | 0.00%        | 0.00%        | 0.00%        | 0.00%        |
| Step 2                                            | 26.87%                 | 0.11%        | 0.08%        | 0.15%        | 26.52%       |
| Step 1                                            | 2.11%                  | 0.27%        | 0.03%        | 0.48%        | 1.33%        |
| Overall                                           | 100.00%                | 1.61%        | 1.58%        | 4.86%        | 91.95%       |
|                                                   |                        | 3.19%        |              | 96.81%       |              |
