# Supplementary material for: Cloud obstruction and snow cover in Alpine areas from MODIS products
Source: Copernicus journal article supplement (doi:10.5194/hess-18-4579-2014), 2014-11-24
Supplement: Supplementary file 23 [file hess-18-4579-2014-supplement.zip]

| CLOUD FREE DAY 282 WITH CLOUD OF DAY 349 | C       | L                       | S     | TOT     |
|------------------------------------------|---------|-------------------------|-------|---------|
| Source Aqua SCA                          | 4.10%   | 87.61%                  | 8.29% | 100.00% |
| Source Terra SCA                         | 4.29%   | 89.74%                  | 5.97% | 100.00% |
| Masked Aqua SCA                          | 73.39%  | 25.66%                  | 0.95% | 100.00% |
| Masked Terra SCA                         | 100.00% | 0.00%                   | 0.00% | 100.00% |
| Delta C Aqua                             | 69.29%  | <u>artificial cloud</u> |       |         |
| Delta C Terra                            | 95.71%  | <u>artificial cloud</u> |       |         |

| Comparison between source TERRA and processed map |                        | errors       |              | correct      |              |
|---------------------------------------------------|------------------------|--------------|--------------|--------------|--------------|
|                                                   | cloud removed cumulate | snow to land | land to snow | snow to snow | land to land |
| Step 1 + 2 + 3 + 4 + 5                            | 100.00%                | 4.76%        | 1.79%        | 1.48%        | 91.97%       |
| Step 1 + 2 + 3 + 4                                | 100.00%                | 4.76%        | 1.79%        | 1.48%        | 91.97%       |
| Step 1 + 2 + 3                                    | 86.38%                 | 0.47%        | 0.62%        | 0.26%        | 85.02%       |
| Step 1 + 2                                        | 85.87%                 | 0.47%        | 0.62%        | 0.26%        | 84.51%       |
| Step 1                                            | 27.18%                 | 0.10%        | 0.56%        | 0.15%        | 26.38%       |
|                                                   | 0.00%                  | 0.00%        | 0.00%        | 0.00%        | 0.00%        |
| Individual steps                                  |                        | errors       |              | correct      |              |
|                                                   | cloud removed relative |              |              |              |              |
| Step 5                                            | 0.00%                  | 0.00%        | 0.00%        | 0.00%        | 0.00%        |
| Step 4                                            | 13.62%                 | 4.29%        | 1.17%        | 1.22%        | 6.95%        |
| Step 3                                            | 0.51%                  | 0.00%        | 0.00%        | 0.00%        | 0.51%        |
| Step 2                                            | 58.69%                 | 0.37%        | 0.06%        | 0.11%        | 58.13%       |
| Step 1                                            | 27.18%                 | 0.10%        | 0.56%        | 0.15%        | 26.38%       |
| Overall                                           | 100.00%                | 4.76%        | 1.79%        | 1.48%        | 91.97%       |
|                                                   |                        | 6.55%        |              | 93.45%       |              |
