# Supplementary material for: Cloud obstruction and snow cover in Alpine areas from MODIS products
Source: Copernicus journal article supplement (doi:10.5194/hess-18-4579-2014), 2014-11-24
Supplement: Supplementary file 24 [file hess-18-4579-2014-supplement.zip]

Validation 2006 - 5 DAYS

| CLOUD FREE DAY 44 WITH CLOUD OF DAY 86 | C      | L                       | S      | TOT     |
|----------------------------------------|--------|-------------------------|--------|---------|
| Source Aqua SCA                        | 12.30% | 63.44%                  | 24.26% | 100.00% |
| Source Terra SCA                       | 8.48%  | 69.53%                  | 21.99% | 100.00% |
| Masked Aqua SCA                        | 91.13% | 6.67%                   | 2.20%  | 100.00% |
| Masked Terra SCA                       | 94.36% | 2.06%                   | 3.57%  | 99.99%  |
| Delta C Aqua                           | 78.83% | <u>artificial cloud</u> |        |         |
| Delta C Terra                          | 85.88% | <u>artificial cloud</u> |        |         |

| Comparison between source TERRA and processed map |         | cloud removed cumulate |              |              |              |
|---------------------------------------------------|---------|------------------------|--------------|--------------|--------------|
|                                                   |         | errors                 |              | correct      |              |
|                                                   |         | snow to land           | land to snow | snow to snow | land to land |
| Step 1 + 2 + 3 + 4 + 5                            | 100.00% | 3.00%                  | 4.10%        | 18.28%       | 74.62%       |
| Step 1 + 2 + 3 + 4                                | 99.99%  | 3.00%                  | 4.10%        | 18.28%       | 74.61%       |
| Step 1 + 2 + 3                                    | 90.15%  | 2.65%                  | 2.80%        | 16.36%       | 68.33%       |
| Step 1 + 2                                        | 73.53%  | 0.99%                  | 2.41%        | 13.63%       | 56.49%       |
| Step 1                                            | 8.06%   | 0.08%                  | 0.52%        | 1.11%        | 6.34%        |
| Individual steps                                  |         | cloud removed relative |              |              |              |
|                                                   |         | errors                 |              | correct      |              |
| Step 5                                            | 0.01%   | 0.00%                  | 0.00%        | 0.00%        | 0.01%        |
| Step 4                                            | 9.84%   | 0.35%                  | 1.30%        | 1.92%        | 6.28%        |
| Step 3                                            | 16.62%  | 1.66%                  | 0.39%        | 2.73%        | 11.84%       |
| Step 2                                            | 65.47%  | 0.91%                  | 1.89%        | 12.52%       | 50.15%       |
| Step 1                                            | 8.06%   | 0.08%                  | 0.52%        | 1.11%        | 6.34%        |
| Overall                                           | 100.00% | 3.00%                  | 4.10%        | 18.28%       | 74.62%       |
|                                                   |         | 7.10%                  |              | 92.90%       |              |
