# Supplementary material for: Cloud obstruction and snow cover in Alpine areas from MODIS products
Source: Copernicus journal article supplement (doi:10.5194/hess-18-4579-2014), 2014-11-24
Supplement: Supplementary file 25 [file hess-18-4579-2014-supplement.zip]

# Validation 2005 - 2 DAYS

## CLOUD FREE DAY 354 WITH CLOUD OF DAY 134

|                  | C      | L      | S      | TOT     |
|------------------|--------|--------|--------|---------|
| Source Aqua SCA  | 45.80% | 42.66% | 11.54% | 100.00% |
| Source Terra SCA | 20.28% | 63.60% | 16.11% | 99.99%  |
| Masked Aqua SCA  | 97.65% | 1.95%  | 0.39%  | 99.99%  |
| Masked Terra SCA | 98.48% | 1.18%  | 0.34%  | 100.00% |
| Delta C Aqua     | 52.00% |        |        |         |
| Delta C Terra    | 78.20% |        |        |         |

artificial cloud

artificial cloud

## Comparison between source TERRA and processed map

|                        | cloud removed cumulate | errors       |              | correct      |              |
|------------------------|------------------------|--------------|--------------|--------------|--------------|
|                        |                        | snow to land | land to snow | snow to snow | land to land |
| Step 1 + 2 + 3 + 4 + 5 | 100.00%                | 1.70%        | 3.15%        | 18.52%       | 76.63%       |
| Step 1 + 2 + 3 + 4     | 99.92%                 | 1.67%        | 3.15%        | 18.51%       | 76.59%       |
| Step 1 + 2 + 3         | 93.65%                 | 1.00%        | 1.89%        | 16.66%       | 74.10%       |
| Step 1 + 2             | 83.80%                 | 0.86%        | 1.35%        | 13.78%       | 67.81%       |
| Step 1                 | 2.89%                  | 0.01%        | 0.27%        | 0.19%        | 2.42%        |
|                        | 0.00%                  | 0.00%        | 0.00%        | 0.00%        | 0.00%        |
| Individual steps       |                        | errors       |              | correct      |              |
| Step 5                 | 0.08%                  | 0.03%        | 0.00%        | 0.01%        | 0.04%        |
| Step 4                 | 6.27%                  | 0.67%        | 1.26%        | 1.85%        | 2.49%        |
| Step 3                 | 9.85%                  | 0.14%        | 0.54%        | 2.88%        | 6.29%        |
| Step 2                 | 80.91%                 | 0.85%        | 1.08%        | 13.59%       | 65.39%       |
| Step 1                 | 2.89%                  | 0.01%        | 0.27%        | 0.19%        | 2.42%        |
| Overall                | 100.00%                | 1.70%        | 3.15%        | 18.52%       | 76.63%       |
|                        |                        | 4.85%        |              | 95.15%       |              |

cloud removed relative
