# Supplementary material for: Cloud obstruction and snow cover in Alpine areas from MODIS products
Source: Copernicus journal article supplement (doi:10.5194/hess-18-4579-2014), 2014-11-24
Supplement: Supplementary file 26 [file hess-18-4579-2014-supplement.zip]

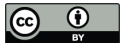

## *Supplement of*

# **Cloud obstruction and snow cover in Alpine areas from MODIS products**

**P. Da Ronco and C. De Michele**

*Correspondence to:* P. Da Ronco ([pierfrancesco.daronco@polimi.it](mailto:pierfrancesco.daronco@polimi.it))

- Supplement-Cover-Letter.pdf
- Additional\_after\_review
  - Apply\_Jan\_2012
    - \* 22\_Jan\_2012\_A.jpg
    - \* 22\_Jan\_2012\_T.jpg
    - \* readme\_apply.txt
    - \* step\_1\_2012.jpg
    - \* step\_2\_2012.jpg
    - \* step\_3\_2012.jpg
    - \* step\_4\_2012.jpg
  - Cloud\_duration\_distribution
    - \* Spring
    - \* Whole\_year
    - \* readme\_clouds.txt
  - SNOW\_LINE
    - \* snow\_line\_2004.jpg
    - \* snow\_line\_2005.jpg
    - \* snow\_line\_2008.jpg
    - \* snow\_line\_2009.jpg
  - Tables\_validation
    - \* results\_1\_2004\_for\_publication.pdf
    - \* results\_1\_2005\_for\_publication.pdf
    - \* results\_1\_2006\_for\_publication.pdf
    - \* results\_1\_2009\_for\_publication.pdf
    - \* results\_1\_2011\_for\_publication.pdf
    - \* results\_1\_2012\_for\_publication.pdf
    - \* results\_2\_2004\_for\_publication.pdf

- \* results\_2\_2005\_for\_publication.pdf
- \* results\_2\_2006\_for\_publication.pdf
- \* results\_2\_2009\_for\_publication.pdf
- \* results\_2\_2011\_for\_publication.pdf
- \* results\_2\_2012\_for\_publication.pdf
- \* results\_3\_2004\_for\_publication.pdf
- \* results\_3\_2006\_for\_publication.pdf
- \* results\_3\_2009\_for\_publication.pdf
- \* results\_3\_2011\_for\_publication.pdf
- \* results\_3\_2012\_for\_publication.pdf
- \* results\_4\_2004\_for\_publication.pdf
- \* results\_4\_2006\_for\_publication.pdf
- \* results\_4\_2009\_for\_publication.pdf
- \* results\_4\_2011\_for\_publication.pdf
- \* results\_4\_2012\_for\_publication.pdf
- \* results\_5\_2004\_for\_publication.pdf
- \* results\_5\_2006\_for\_publication.pdf
- \* results\_6\_2004\_for\_publication.pdf
- Validation\_2\_example\_days
  - \* 2004
  - \* 2012
  - \* valCR.png
  - \* validation.txt
